# Supplementary material for: Biofabrication of Zinc Oxide Nanoparticle fromOchradenus baccatusLeaves: Broad-Spectrum Antibiofilm Activity, Protein Binding Studies, andIn VivoToxicity and Stress Studies
Source: Hindawi journal article supplement (doi:10.1155/2018/8612158), 2018-01-01
Supplement: f1 [file 8612158.f1.docx]

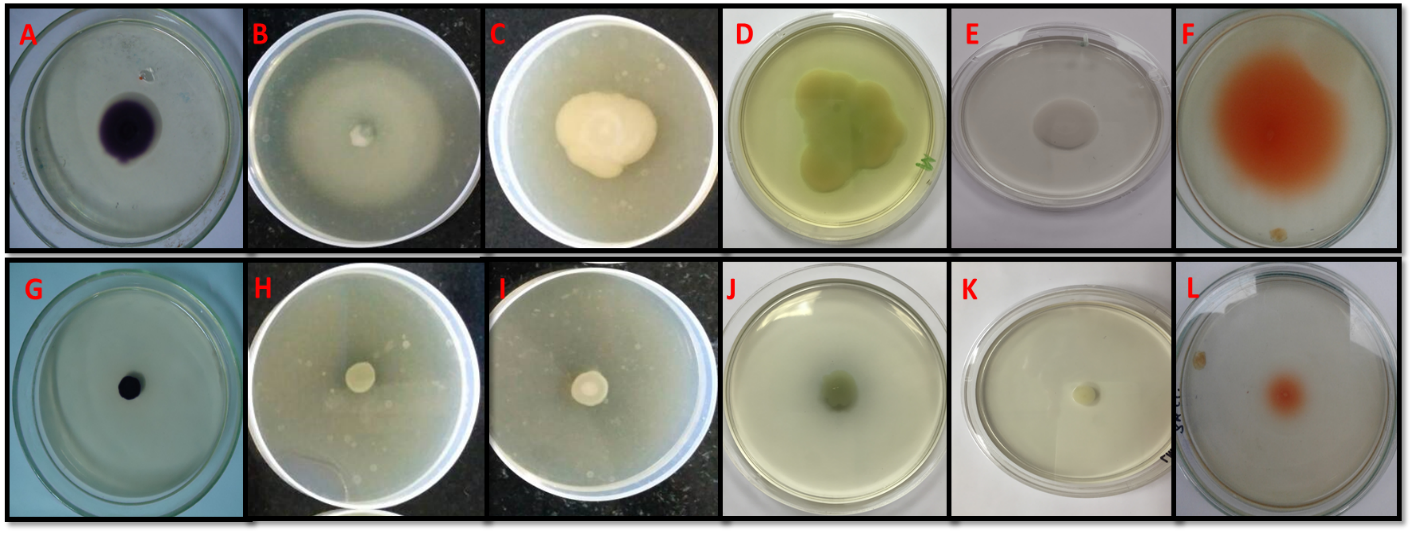


**FIGURE S1:** Effect of OB-ZnNPs on swarming motility of food pathogens. (A-F) untreated strains and (e-h) OB-ZnNPs treated (1/2 x MIC) plates of *C. violaceum*, *E. coli*, *L. monocytogenes*, *P. aeruginosa*, *K. pneumoniae*, *S. marcescens*, respectively.


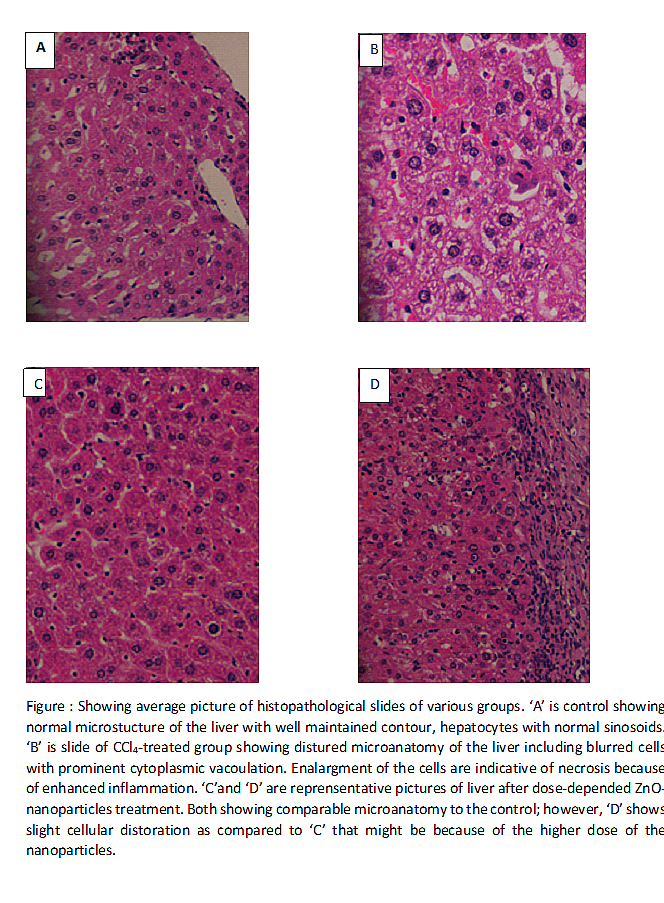


**FIGURE S2:** Histopathological slides of various groups. A. Control showing normal microstructures of the liver with well-maintained contour, hepatocytes with normal sinosoids. B. CCl4 treated group showing disturbed microanatomy of the liver including blurred cells with prominent cytoplasmic vacoulation. Enlargement of the cells are indicative of the necrosis. C and D. are representative images of liver after dose dependent treatment with OB-ZnONPs. Both show comparable microanatomy to the control. Slight distortion is observed in image D that might be due to the usage of higher dose of nanoparticles
